# Supplementary material
Source: Springer Nature journal article supplement (https://www.springermedizin.de/resource/supplementary/12891_2007_455_MOESM6_ESM.pdf/9511468)
Supplement: MOESM6 [file 9511468]

Difference between the two observations

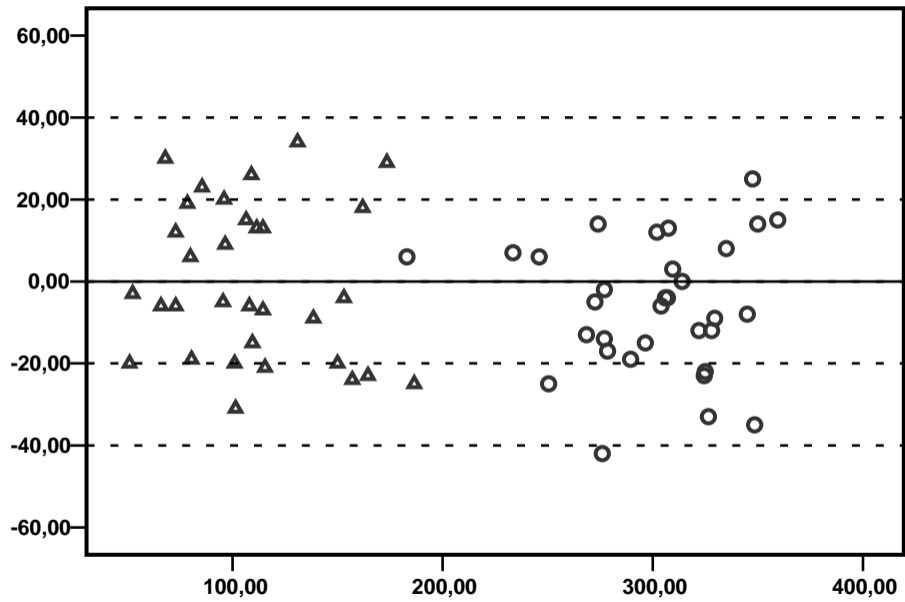

- △ Affected side
- Non-affected side

C. PROM (Mean of the two observations)
